# Supplementary material for: Redefining the specificity of phosphoinositide-binding by human PH domain-containing proteins
Source: PubMed Central journal article supplement (PMC8282632; doi:10.1038/s41467-021-24639-y), 2021-07-15
Supplement: 41467_2021_24639_MOESM1_ESM.pdf [file 41467_2021_24639_MOESM1_ESM.pdf]

Supplementary Information for:

**Redefining the specificity of phosphoinositide-binding by human  
PH domain-containing proteins**

Nilmani Singh<sup>1†</sup>, Adriana Reyes-Ordoñez<sup>1†</sup>, Michael A. Compagnone<sup>1</sup>, Jesus F. Moreno<sup>1</sup>,  
Benjamin J. Leslie<sup>2</sup>, Taekjip Ha<sup>2,3,4,5</sup>, Jie Chen<sup>1\*</sup>

<sup>1</sup>Department of Cell & Developmental Biology, University of Illinois at Urbana-Champaign, Urbana, IL 61801; <sup>2</sup>Department of Biophysics and Biophysical Chemistry, Johns Hopkins University School of Medicine, Baltimore, MD 21205; <sup>3</sup>Department of Biophysics, Johns Hopkins University, Baltimore, MD 21218; <sup>4</sup>Department of Biomedical Engineering, Johns Hopkins University, Baltimore, MD 21205; <sup>5</sup>Howard Hughes Medical Institute, Baltimore, MD 21205, USA

<sup>†</sup>These authors contributed equally to this work.

\*Correspondence: [jiechen@illinois.edu](mailto:jiechen@illinois.edu).

| <b>PH Domain</b> | <b>Lipid binding by PH domain</b>        | <b>Lipid binding by full-length protein</b>                                                              |
|------------------|------------------------------------------|----------------------------------------------------------------------------------------------------------|
| ACAP1_PH         | PI(3,4)P <sub>2</sub>                    | PI(3,4)P <sub>2</sub> , PI(4)P                                                                           |
| ADAP1_PH1        | None                                     | PI(3,4,5)P <sub>3</sub> , PI(4,5)P <sub>2</sub> , PI(3,4)P <sub>2</sub>                                  |
| ADAP1_PH2        | None                                     | PI(3,4,5)P <sub>3</sub> , PI(4,5)P <sub>2</sub> , PI(3,4)P <sub>2</sub>                                  |
| ARHGEF3-PH       | Various PIPs, see Figure 3               | PI(4,5)P <sub>2</sub> , PI(3,5)P <sub>2</sub>                                                            |
| ARHGEF5_PH       | None                                     | PI(4,5)P <sub>2</sub> , PI(3,4)P <sub>2</sub>                                                            |
| ARHGEF9_PH       | None                                     | PI(5)P                                                                                                   |
| DOK2-PH          | PI(3,4,5)P <sub>3</sub> , PI(3)P, PI(4)P | PI(3)P                                                                                                   |
| FERMT3-PH        | None                                     | PI(3,4,5)P <sub>3</sub> , PI(3,4)P <sub>2</sub>                                                          |
| PLEKHA1-PH1      | None                                     | PI(3,4)P <sub>2</sub>                                                                                    |
| PLEKHA1-PH2      | PI(3,4)P <sub>2</sub>                    | PI(3,4)P <sub>2</sub>                                                                                    |
| SPATA13-PH       | None                                     | Bound all lipid vesicles                                                                                 |
| VAV1-PH          | None                                     | PI(3,4,5)P <sub>3</sub> , PI(4,5)P <sub>2</sub> , PI(3,4)P <sub>2</sub> , PI(3,5)P <sub>2</sub> , PI(5)P |

**Supplementary Table 1. SiMPull assay results for selected PH domains.** All fusion proteins had EGFP at the N-terminus except that ARHGEF3-PH was analyzed with both N-terminus and C-terminus fusions (see Figure 3 and Supplementary Figure S3). Experimental details and data processing were as described for Table 1. At least three independent experiments were performed with similar outcome for each PH domain.

## SUPPLEMENTARY FIGURES

**a**

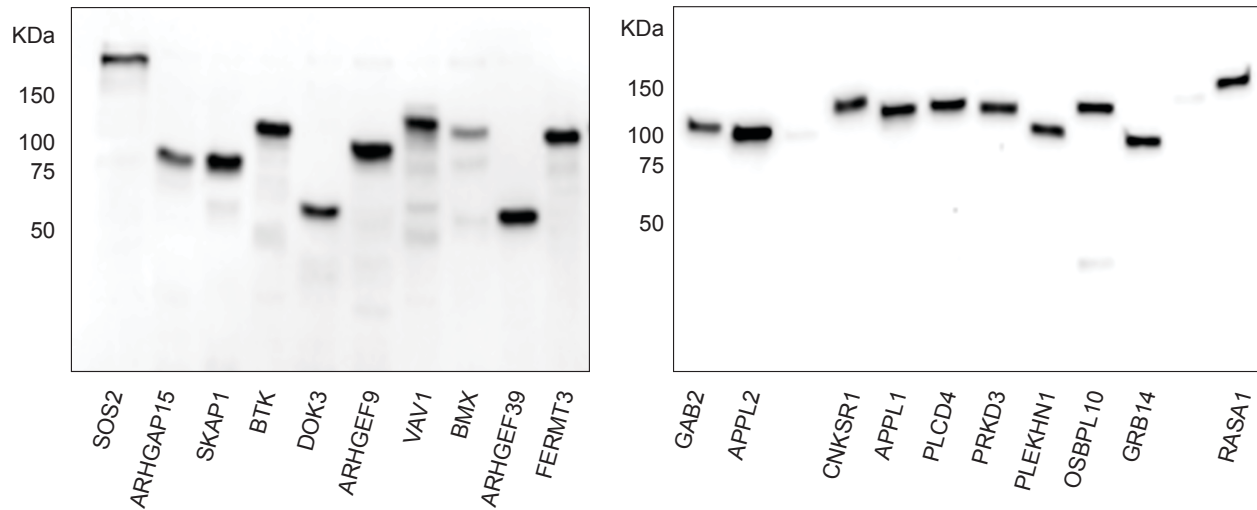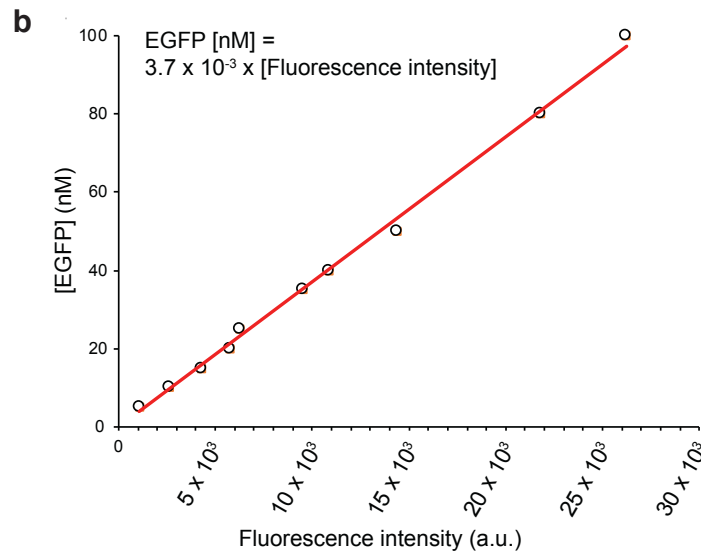

### Supplementary Figure 1. Characterization of EGFP-fusion proteins for lipid-SiMPull assay.

(a) Examples of EGFP-fusion proteins transiently expressed in HEK293 cells. Cell lysates were subjected to western blotting with an anti-GFP antibody. Each fusion protein was analyzed for expression in at least 3 independent experiments. (b) Fluorescence of pure recombinant EGFP (ex 488 / em 520) was measured at 10 different concentrations on a Spectramax GeminiXPS plate reader (Molecular Devices) to yield a linear standard curve.  $\text{EGFP [nM]} = 3.7 \times 10^{-3} \times [\text{Fluorescence Intensity(a.u.)}]$ .  $R^2 = 0.9969$ . Source data are provided as a Source Data file. The experiment was repeated 3 times with similar results.

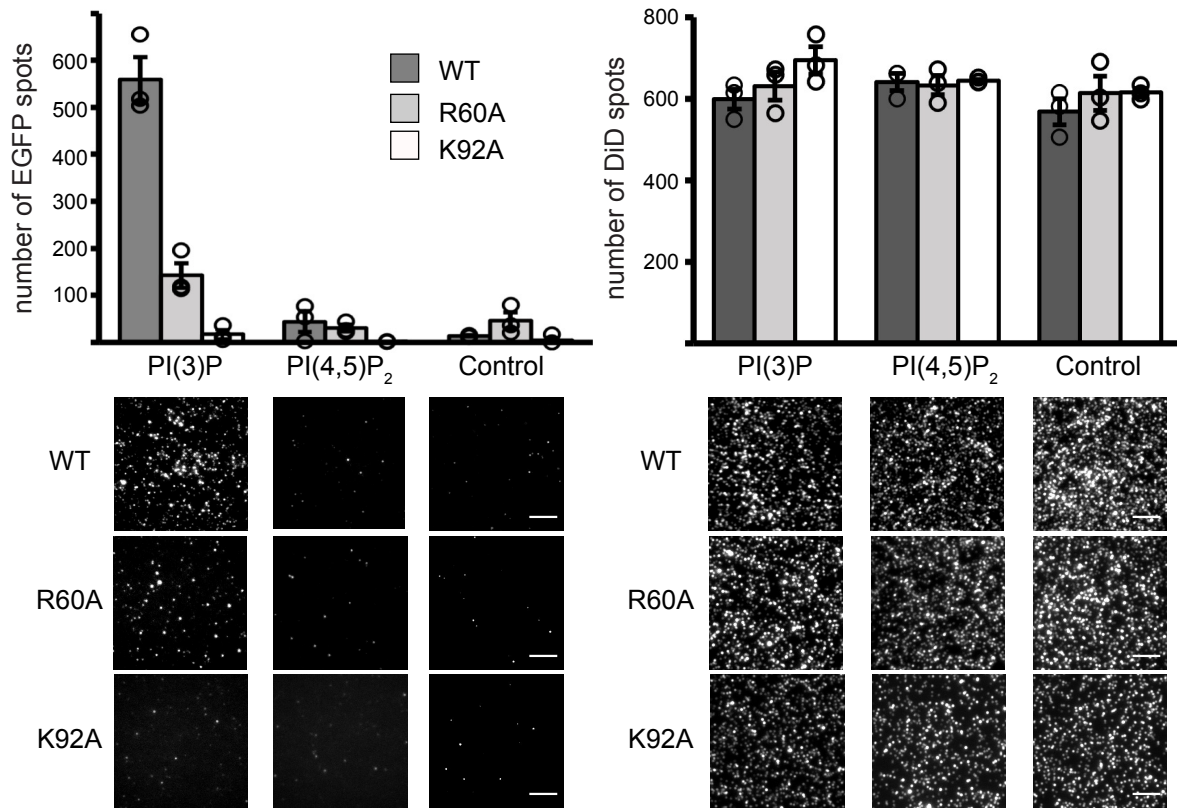

### Supplementary Figure 2. Determining sensitivity of lipid-SiMPull assay.

EGFP-p40PhoxPX and mutants were expressed in HEK293 cells, and cell lysates (5 nM EGFP-fusion) were subjected to SiMPull assay with PI(3)P, PI(4,5)P<sub>2</sub> and PC (control) vesicles. The numbers of EGFP and DiD (vesicle) spots were quantified as described in Figure 1 legend and presented in the graphs. Representative images are shown below the graphs. Data are presented as mean ± SEM (n = 3 independent experiments). Source data are provided as a Source Data file. Scale bars: 5 μm.



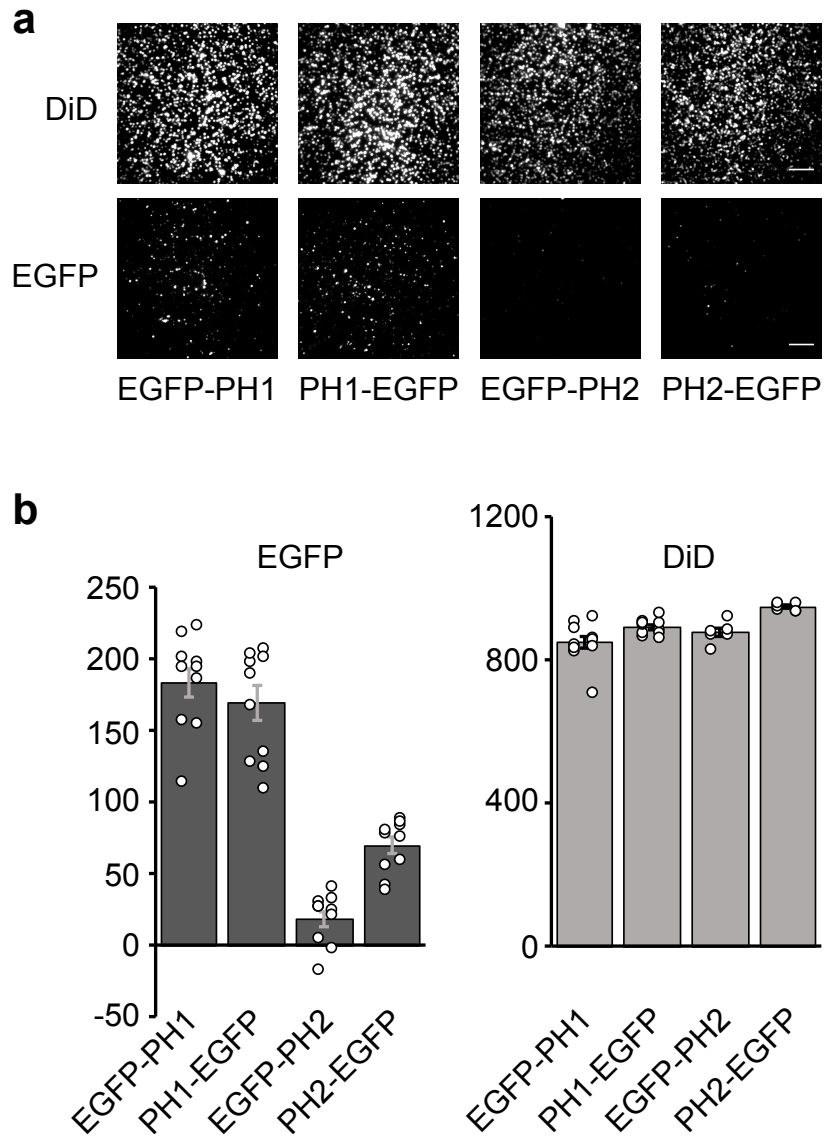

**Supplementary Figure 3. Binding of ARHGEF3 PH domain to PI(4,5)P<sub>2</sub>.**

Various EGFP fusions of ARHGEF3-PH domain were expressed in HEK293 cells, and cell lysates (5 nM EGFP-fusion) were subjected to SiMPull assay with PI(4,5)P<sub>2</sub> vesicles. EGFP was fused at either terminus of the PH as indicated by the names of the constructs. PH1: aa320-455. PH2: aa299-466. **(a)** Representative images of EGFP and DiD. Scale bars: 5 μm. **(b)** Numbers of fluorescent molecules per image area are shown. Data are presented as mean ± SEM. N ≥ 10 images for EGFP; N ≥ 6 images for DiD. Source data are provided as a Source Data file, which lists the exact N number for each data point. Three independent experiments were performed with similar results.

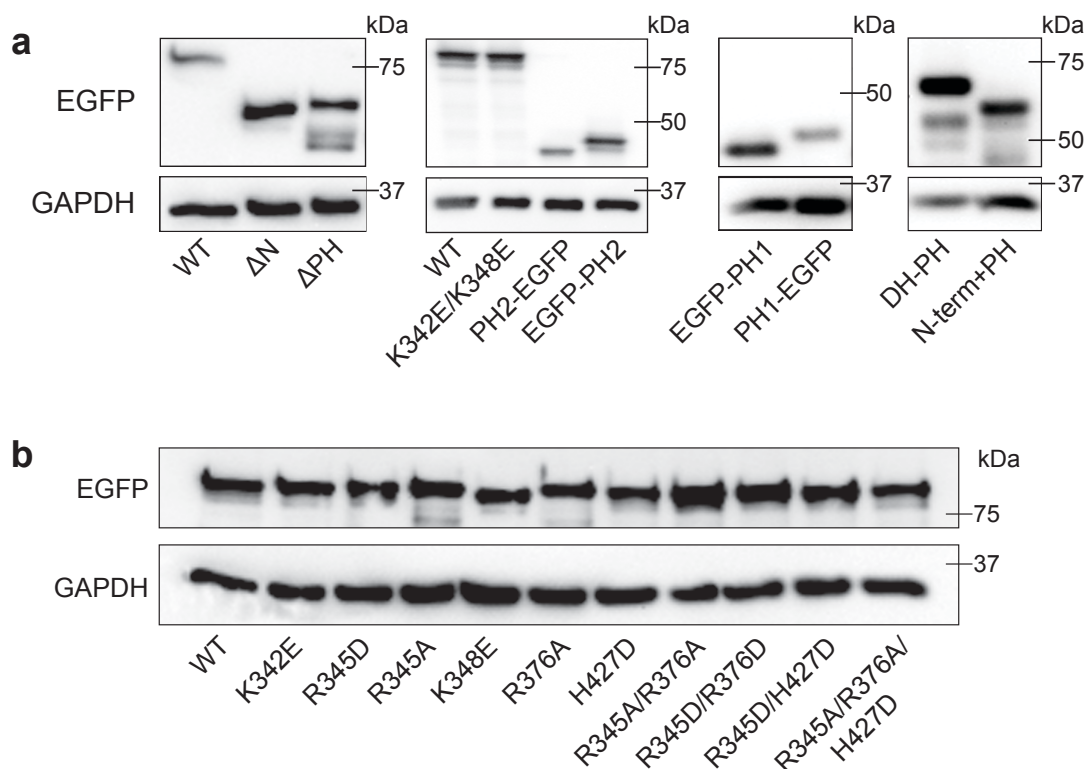

**Supplementary Figure 4. Expression of ARHGEF3 truncations and mutants as EGFP fusion proteins.**

HEK293 cells were transiently transfected to express various truncations (**a**) or point mutants (**b**) of ARHGEF3 fused to EGFP. Cell lysates were analyzed by western blotting with an anti-GFP antibody, and anti-GAPDH blotting served as loading control. EGFP was tagged at either terminus of the PH domain (EGFP-PH or PH-EGFP). All other constructs have the EGFP at their N-terminus. PH1: aa320-455. PH2: aa299-466. DH-PH: aa125-455. N-term+PH: aa1-125+aa320-455.  $\Delta$ N: aa118-526.  $\Delta$ PH: aa304-466 deleted. Uncropped and unprocessed western blot images are provided as a Source Data file. Each recombinant protein was analyzed for expression in at least 2 independent experiments.

**a**

| PROTEIN  | LIPIDS BOUND WITH MAMMALIAN LYSATES           | LIPIDS BOUND WITH BACTERIAL LYSATES             |
|----------|-----------------------------------------------|-------------------------------------------------|
| ARHGEF3  | PI(4,5)P <sub>2</sub> , PI(3,5)P <sub>2</sub> | PI(4,5)P <sub>2</sub>                           |
| ARHGEF16 | PI(3)P                                        | PI(3)P                                          |
| DEF6     | PI(3,4)P <sub>2</sub>                         | PI(3,4,5)P <sub>3</sub> , PI(3,4)P <sub>2</sub> |
| ITK      | PI(3,4,5)P <sub>3</sub>                       | PI(3,4,5)P <sub>3</sub>                         |

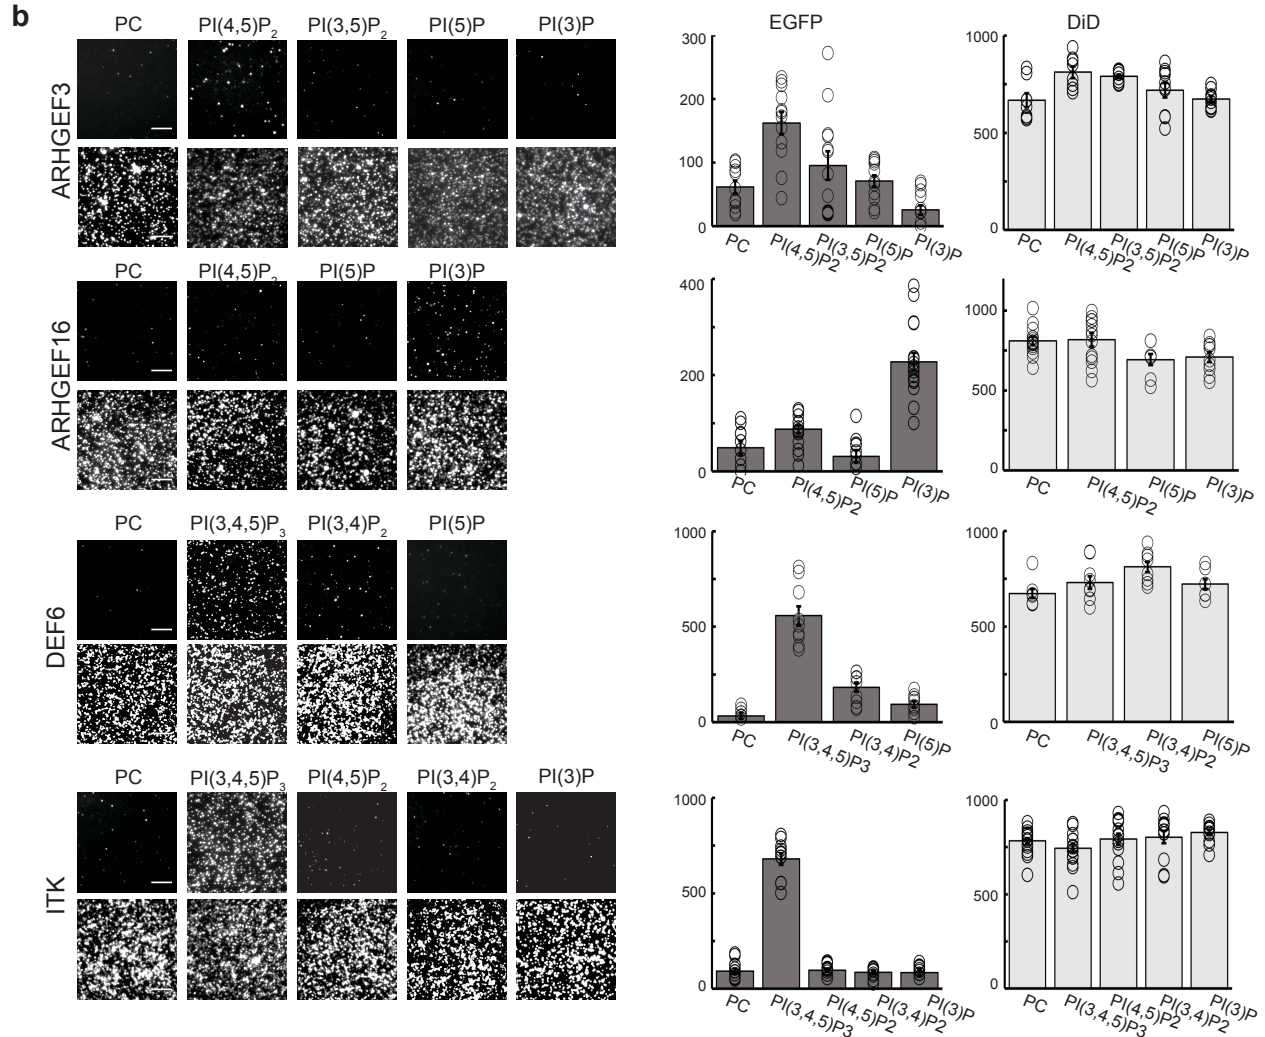

**Supplementary Figure 5. Results of lipid SiMPull assays with bacterial lysates.**

Bacterial lysates expressing SUMO-EGFP-fusion proteins (5 nM EGFP-fusion) were subjected to SiMPull assays. **(a)** The PH domain-containing proteins assayed and their PIP binding profiles in mammalian versus bacterial cell lysates. **(b)** Representative images of assays are shown. Scale bars: 5  $\mu$ m. Numbers of fluorescent molecules per image area are shown at the right. Data are presented as mean  $\pm$  SEM.  $N \geq 10$  images for EGFP;  $N \geq 6$  images for DiD. Source data are provided as a Source Data file, which lists the exact N number for each data point. Three independent experiments were performed with similar results.



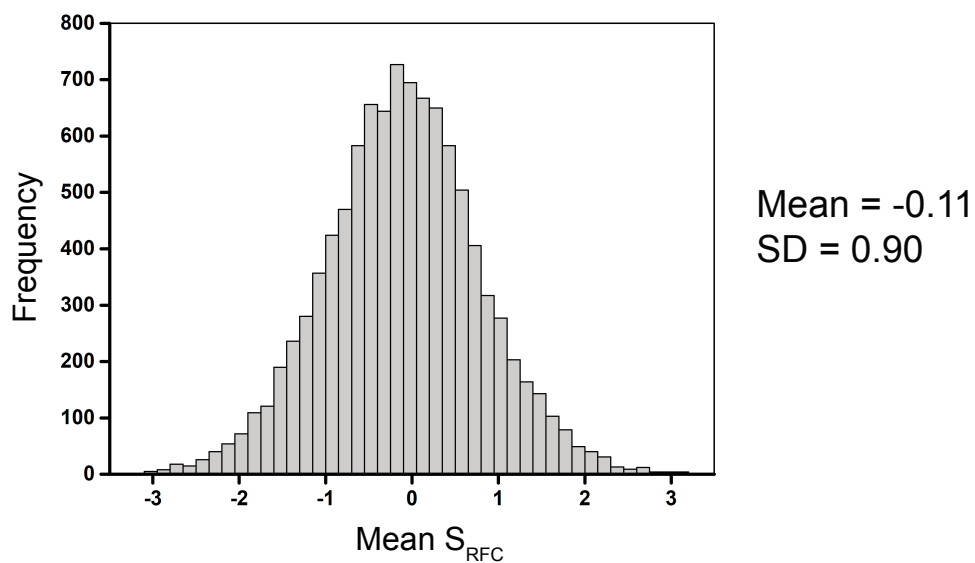

**Supplementary Figure 7. Determining a cut-off  $S_{RFC}$  score for PIP-binding prediction.**

The sequences of 242 human PH domains were scrambled 10,000 times, and the  $S_{RFC}$  for each scrambled sequence was calculated. The distribution of mean  $S_{RFC}$  is shown, with the overall mean and standard deviation indicated. Source data are provided as a Source Data file.
